# Supplementary material
Source: Royal Society of Chemistry journal article supplement (doi:10.1039/d6ta02530g)
Supplement: d6ta02530g1.pdf [file d6ta02530g1.pdf]

## Supporting Information

### **Boron doping modulates the electrostatic interaction of Na-O bond for inducing P2/O3 biphasic structure in layered oxide cathode**

Nianhui Li,<sup>a</sup> Pengrui Liang<sup>a</sup> and Yongchun Zhu<sup>\*a</sup>

<sup>a</sup> Address here. School of Chemistry and Materials Science, University of Science & Technology of China, Anhui, 230026, China. Email: [yhzhu@ustc.edu.cn](mailto:yhzhu@ustc.edu.cn)

\* Corresponding author. E-mail: [yhzhu@ustc.edu.cn](mailto:yhzhu@ustc.edu.cn)

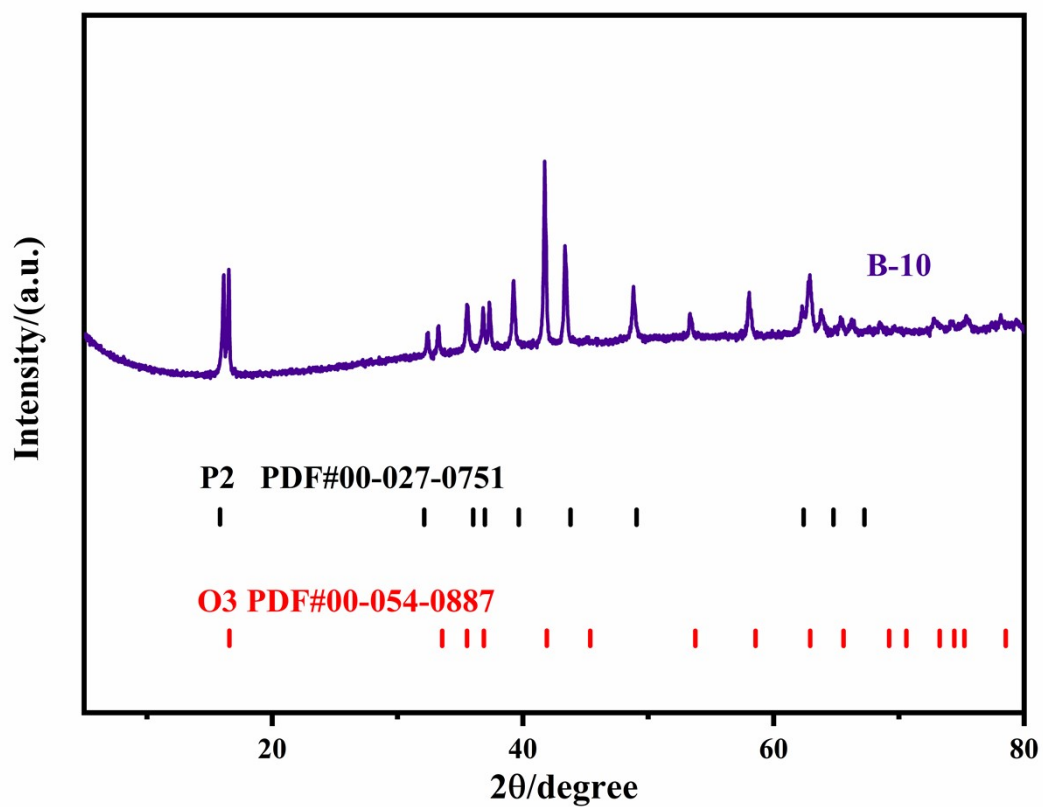

**Figure S1.** The XRD pattern of the B-10 ( $\text{Na}_{0.8}\text{Fe}_{1/3}\text{Ni}_{1/3}\text{Mn}_{1/3}\text{B}_{0.10}\text{O}_2$ )

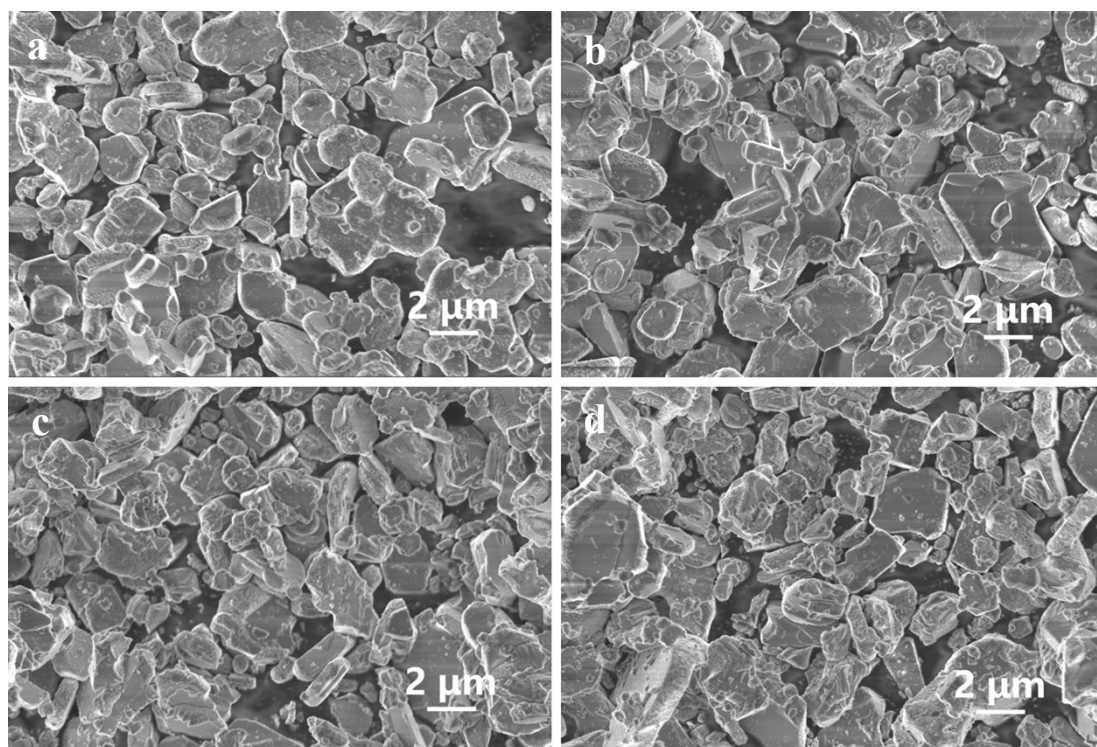

**Figure S2.** SEM images of a) B-1 , b) B-2, c) B-3 and d) B-4 powders

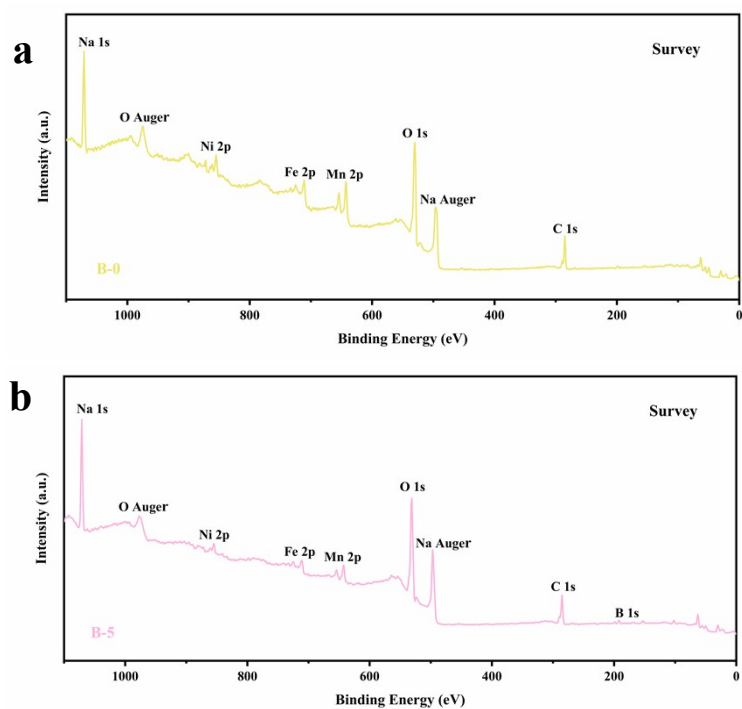

Figure S3. The XPS Survey spectrum: a) B-0, B) B-5

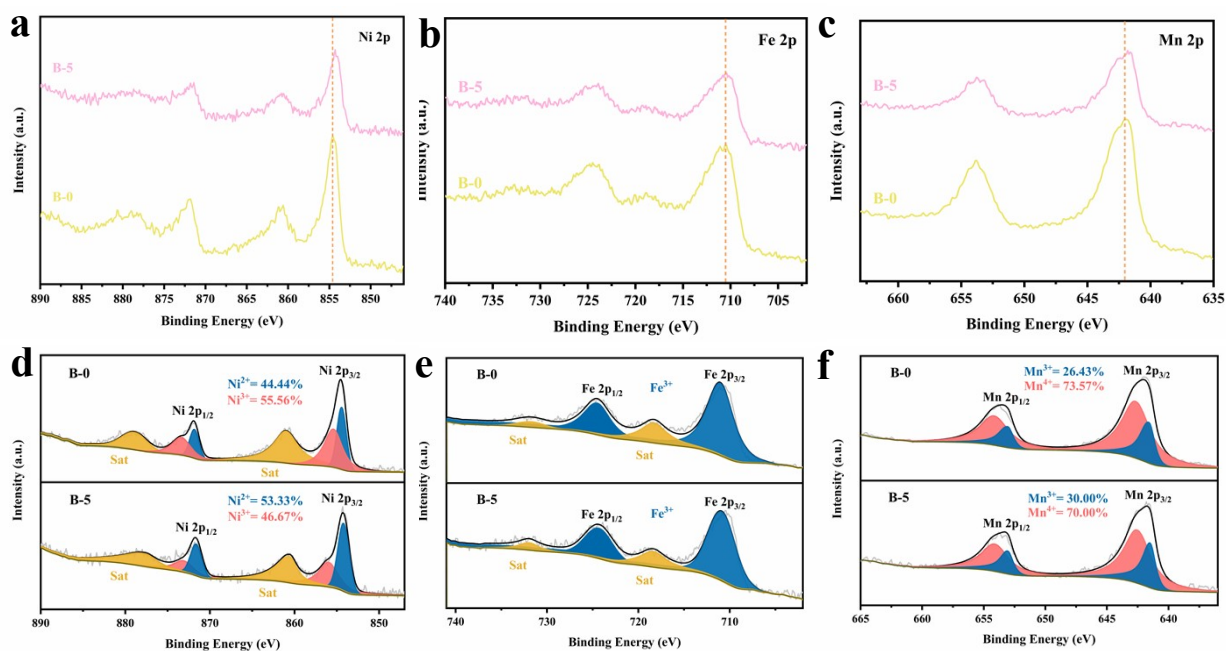

Figure S4. The XPS spectra of a,d) Ni 2p, b,e) Fe 2p and c,f) Mn 2p in B-0 and B-5

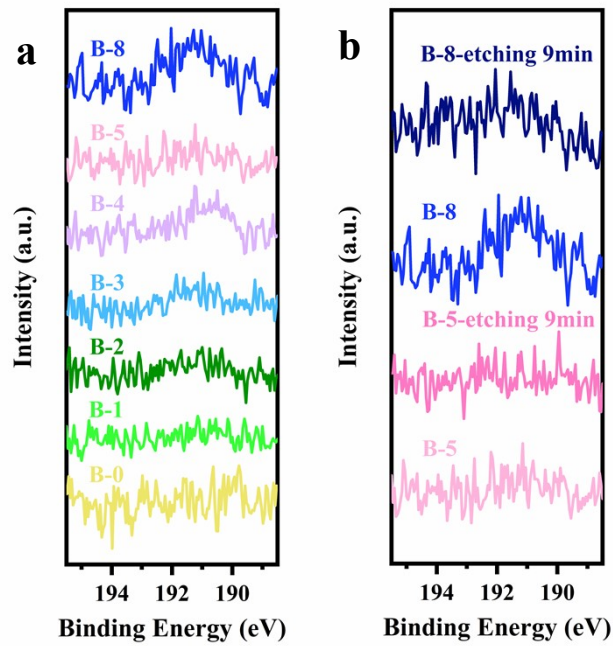

**Figure S5.** a) XPS spectra of B-x (x=0, 1, 2, 3, 4, 5, 8) for B1s. b) XPS spectra Comparison of B-x (x=5, 8) for B1s after etching

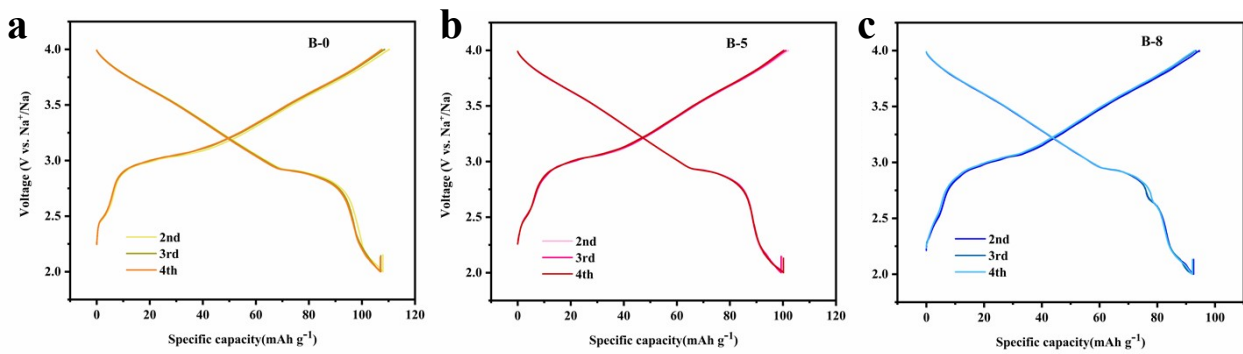

**Figure S6.** Galvanostatic charge-discharge curves at 0.1C of a) B-0 , b) B-5 and c) B-8 cathode

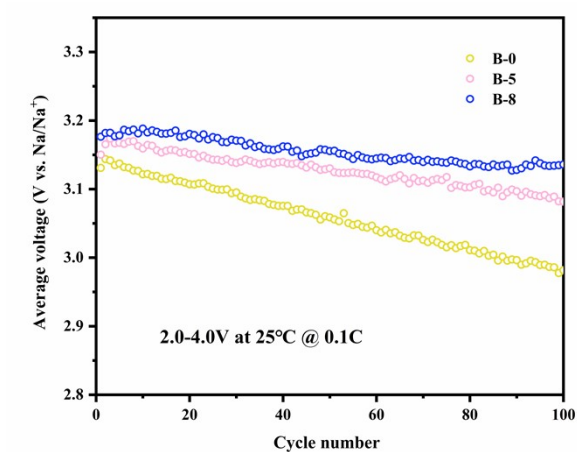

**Figure S7.** Average voltage over 100 cycles at 0.1C

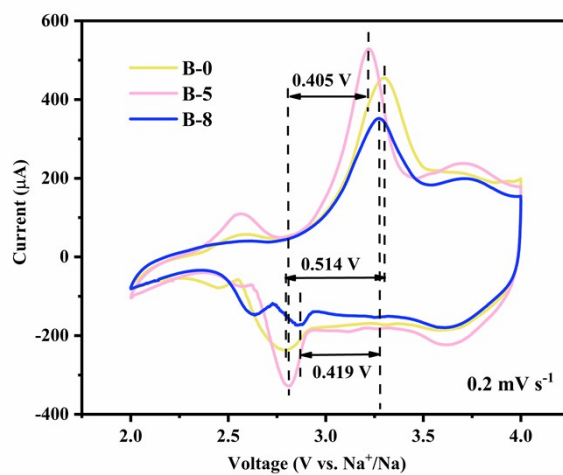

**Figure S8.** CV curves at  $0.2 \text{ mV s}^{-1}$  of both cathodes

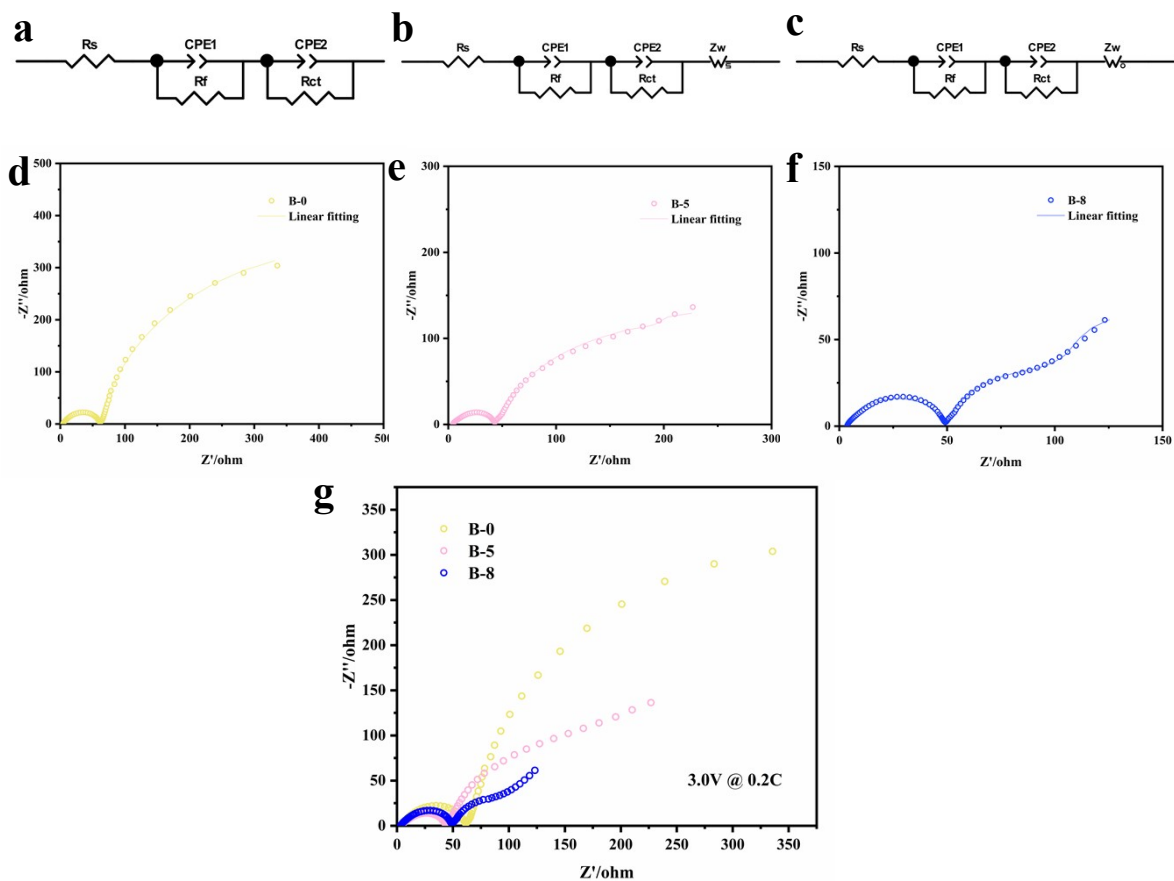

**Figure S9.** Equivalent circuit employed to match the electrochemical impedance spectroscopy of a)B-0, b)B-5, c)B-8. EIS measurements of d)B-0, e)B-5, f)B-8 and g)Summary at 3.0V after 12 cycles at a low current density of 0.2 C

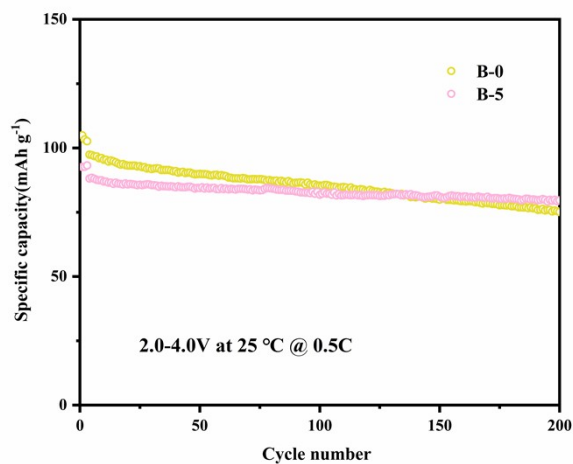

**Figure S10.** Long-term cycling performance at 25 °C at 0.5 C

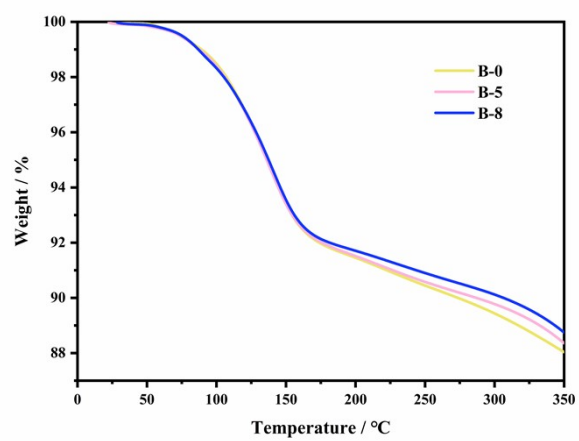

**Figure S11.** TG curves of B-0, B-5 and B-8

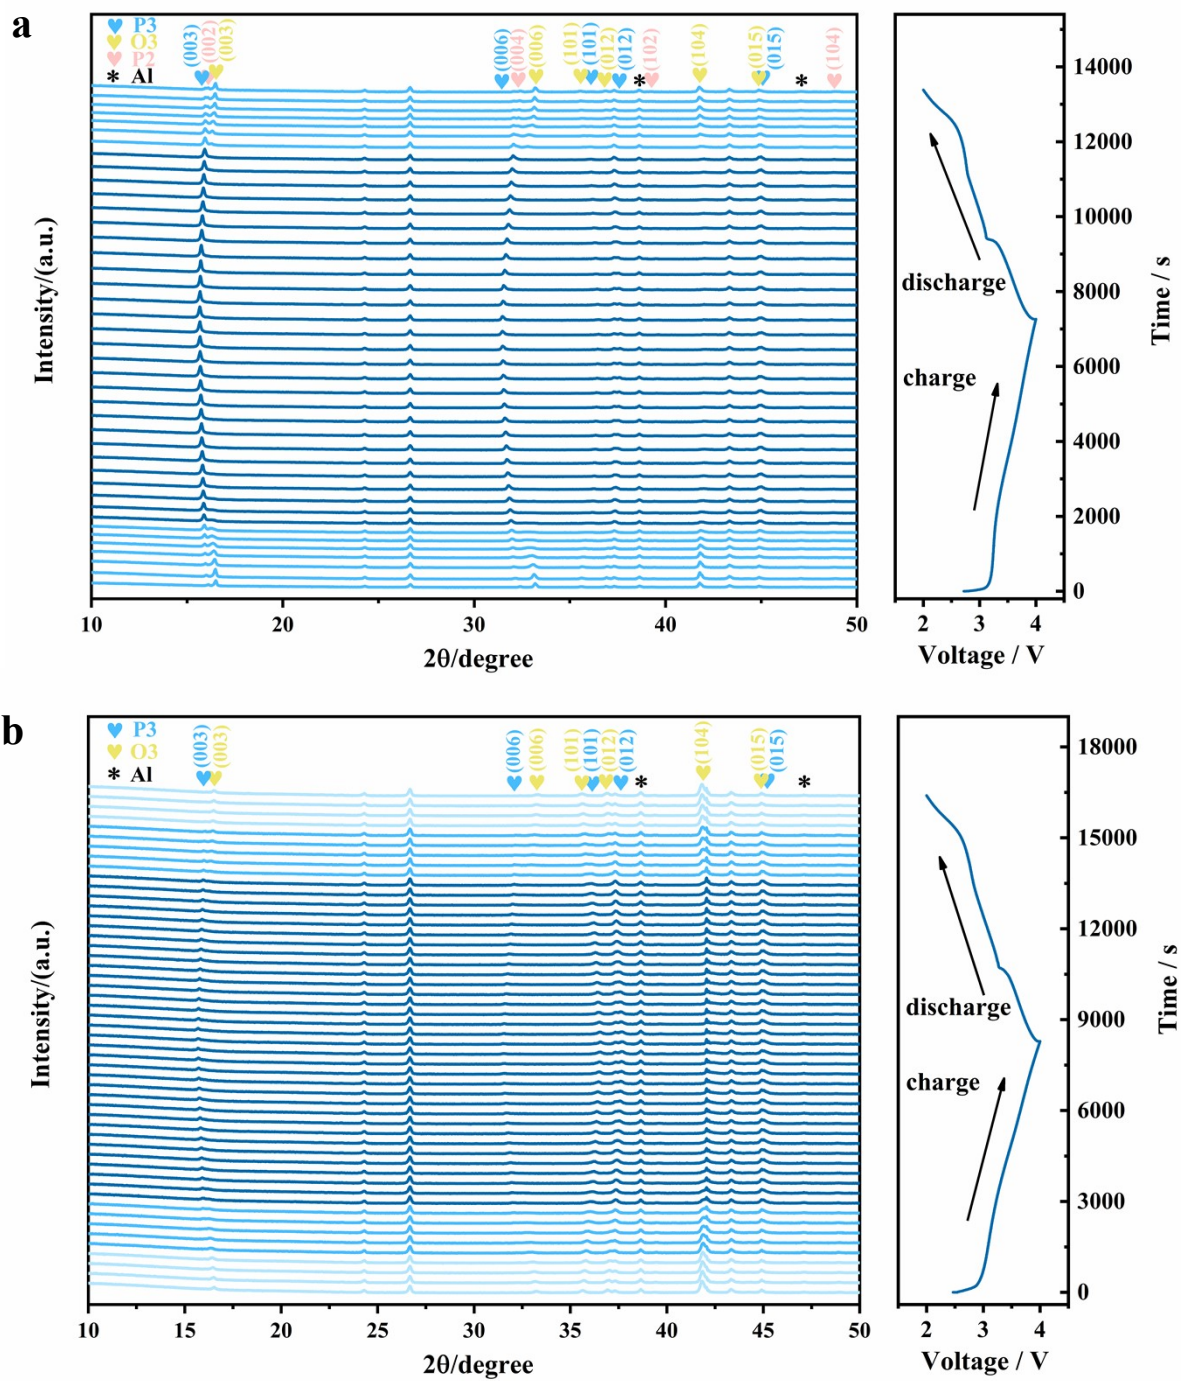

**Figure S12.** In situ XRD pattern of a)B-5 and b)B-0 cathode during the first charge/discharge curve at  $48 \text{ mA g}^{-1}$  between 2.0 and 4.0 V

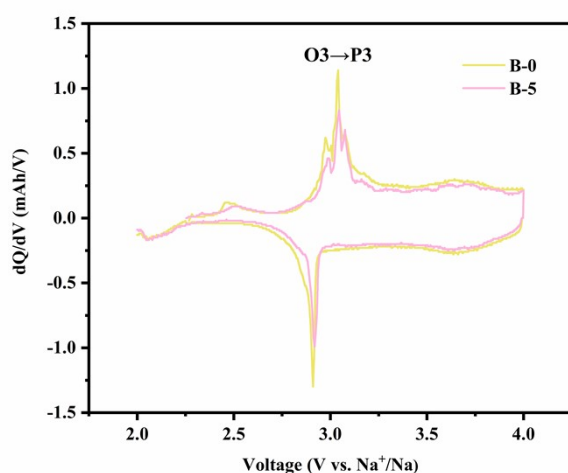

**Figure S13.** The dQ/dV curves of B-0 and B-5 at 0.1 C denoting the phase transition process

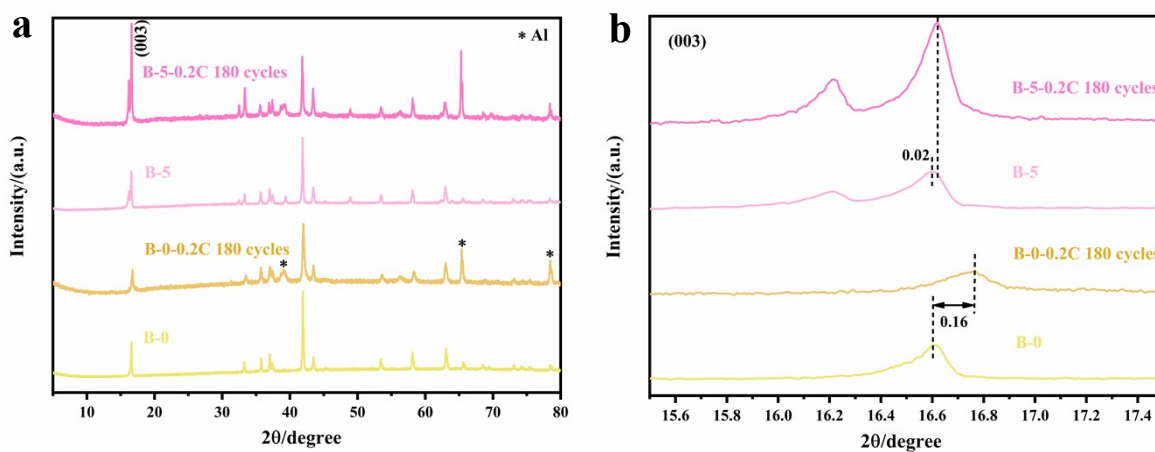

**Figure S14.** a)XRD patterns of B-0 and B-5 before and after 180 cycles at 0.2 C, and b)corresponding magnified view of (003) peaks.

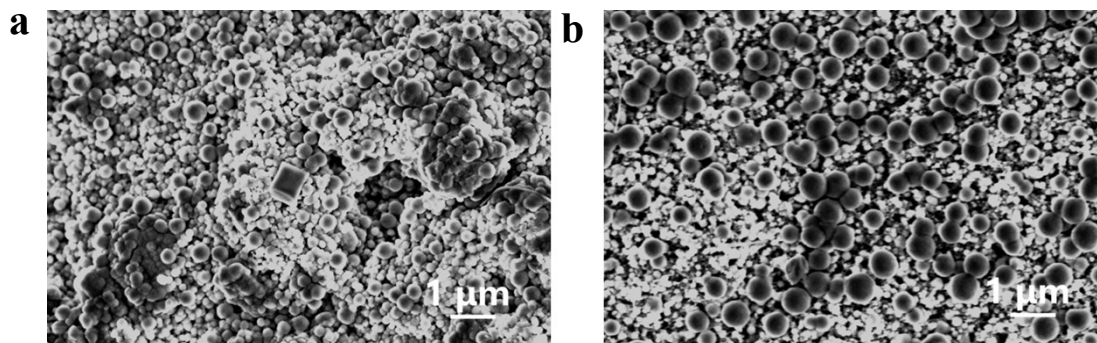

**Figure S15.** SEM images of a) B-0 , b) B-5 cathode after 180 cycles at 0.2 C

**Table S1.** Chemical composition of B-x (x=0, 1, 2, 3, 4, 5, 8) determined by ICP-OES measurements. (Atomic Ratio)

| Samplpes | Na   | Ni   | Fe   | Mn   | B      |
|----------|------|------|------|------|--------|
| B-0      | 0.76 | 0.32 | 0.35 | 0.33 | 0.0000 |
| B-1      | 0.78 | 0.30 | 0.35 | 0.35 | 0.0044 |
| B-2      | 0.76 | 0.31 | 0.34 | 0.35 | 0.0099 |
| B-3      | 0.72 | 0.31 | 0.35 | 0.34 | 0.0178 |
| B-4      | 0.72 | 0.31 | 0.35 | 0.34 | 0.0231 |
| B-5      | 0.77 | 0.30 | 0.35 | 0.35 | 0.0291 |
| B-8      | 0.76 | 0.31 | 0.35 | 0.34 | 0.0695 |

**Table S2** Crystallographic data and atomic occupancies of the B-0 from Rietveld refinement with the corresponding XRD data.

| B-0 O3 Phase            |         |         | Fraction = 100%          |                                  |
|-------------------------|---------|---------|--------------------------|----------------------------------|
| R <sub>p</sub> = 3.81%  |         |         | R <sub>wp</sub> = 5.996% |                                  |
| a (Å) = b (Å) = 2.95315 |         |         | c (Å) = 16.26710         | V (Å <sup>3</sup> ) = 122.860358 |
| atom                    | x       | y       | z                        | Occ                              |
| Na                      | 0.00000 | 0.00000 | 0.50000                  | 0.800                            |
| Ni                      | 0.00000 | 0.00000 | 0.00000                  | 0.333                            |
| Mn                      | 0.00000 | 0.00000 | 0.00000                  | 0.333                            |
| Fe                      | 0.00000 | 0.00000 | 0.00000                  | 0.333                            |
| O                       | 0.00000 | 0.00000 | 0.26820                  | 1.000                            |

**Table S3** Crystallographic data and atomic occupancies of the B-1 from Rietveld refinement with the corresponding XRD data.

| B-1 O3 Phase            |   |   | Fraction = 100%          |                                  |
|-------------------------|---|---|--------------------------|----------------------------------|
| R <sub>p</sub> = 2.81%  |   |   | R <sub>wp</sub> = 5.214% |                                  |
| a (Å) = b (Å) = 2.95503 |   |   | c (Å) = 16.25630         | V (Å <sup>3</sup> ) = 122.935161 |
| atom                    | x | y | z                        | Occ                              |

|    |         |         |         |       |
|----|---------|---------|---------|-------|
| Na | 0.00000 | 0.00000 | 0.50000 | 0.800 |
| Ni | 0.00000 | 0.00000 | 0.00000 | 0.333 |
| Mn | 0.00000 | 0.00000 | 0.00000 | 0.333 |
| Fe | 0.00000 | 0.00000 | 0.00000 | 0.333 |
| O  | 0.00000 | 0.00000 | 0.26960 | 1.000 |

**Table S4** B-2 Crystallographic data and atomic occupancies of the B-2 from Rietveld refinement with the corresponding XRD data.

| B-2 O3 Phase                            |         | Fraction = 100%           |                               |       |
|-----------------------------------------|---------|---------------------------|-------------------------------|-------|
| $R_p = 2.97\%$                          |         | $R_{wp} = 5.321\%$        |                               |       |
| $a (\text{Å}) = b (\text{Å}) = 2.95719$ |         | $c (\text{Å}) = 16.24810$ | $V (\text{Å}^3) = 123.052854$ |       |
| atom                                    | x       | y                         | z                             | Occ   |
| Na                                      | 0.00000 | 0.00000                   | 0.50000                       | 0.800 |
| Ni                                      | 0.00000 | 0.00000                   | 0.00000                       | 0.333 |
| Mn                                      | 0.00000 | 0.00000                   | 0.00000                       | 0.333 |
| Fe                                      | 0.00000 | 0.00000                   | 0.00000                       | 0.333 |
| O                                       | 0.00000 | 0.00000                   | 0.26750                       | 1.000 |

**Table S5** B-3 Crystallographic data and atomic occupancies of the B-3 from Rietveld refinement with the corresponding XRD data.

| B-3 O3 Phase                            |         | Fraction = 100%           |                               |       |
|-----------------------------------------|---------|---------------------------|-------------------------------|-------|
| $R_p = 2.80\%$                          |         | $R_{wp} = 5.043\%$        |                               |       |
| $a (\text{Å}) = b (\text{Å}) = 2.95721$ |         | $c (\text{Å}) = 16.24900$ | $V (\text{Å}^3) = 123.061339$ |       |
| atom                                    | x       | y                         | z                             | Occ   |
| Na                                      | 0.00000 | 0.00000                   | 0.50000                       | 0.800 |
| Ni                                      | 0.00000 | 0.00000                   | 0.00000                       | 0.333 |
| Mn                                      | 0.00000 | 0.00000                   | 0.00000                       | 0.333 |
| Fe                                      | 0.00000 | 0.00000                   | 0.00000                       | 0.333 |

|   |         |         |         |       |
|---|---------|---------|---------|-------|
| O | 0.00000 | 0.00000 | 0.26660 | 1.000 |
|---|---------|---------|---------|-------|

**Table S6** Crystallographic data and atomic occupancies of the B-4 from Rietveld refinement with the corresponding XRD data.

| B-4 O3 Phase            |         | Fraction = 100%          |                                  |       |
|-------------------------|---------|--------------------------|----------------------------------|-------|
| R <sub>p</sub> = 2.87%  |         | R <sub>wp</sub> = 5.226% |                                  |       |
| a (Å) = b (Å) = 2.95463 |         | c (Å) = 16.25870         | V (Å <sup>3</sup> ) = 122.920017 |       |
| atom                    | x       | y                        | z                                | Occ   |
| Na                      | 0.00000 | 0.00000                  | 0.50000                          | 0.800 |
| Ni                      | 0.00000 | 0.00000                  | 0.00000                          | 0.333 |
| Mn                      | 0.00000 | 0.00000                  | 0.00000                          | 0.333 |
| Fe                      | 0.00000 | 0.00000                  | 0.00000                          | 0.333 |
| O                       | 0.00000 | 0.00000                  | 0.26780                          | 1.000 |

**Table S7** Crystallographic data and atomic occupancies of the B-5 from Rietveld refinement with the corresponding XRD data.

| B-5 O3 Phase            |         | Fraction = 89.70%        |                                  |       |
|-------------------------|---------|--------------------------|----------------------------------|-------|
| R <sub>p</sub> = 2.98%  |         | R <sub>wp</sub> = 5.401% |                                  |       |
| a (Å) = b (Å) = 2.95758 |         | c (Å) = 16.25050         | V (Å <sup>3</sup> ) = 123.103494 |       |
| atom                    | x       | y                        | z                                | Occ   |
| Na                      | 0.00000 | 0.00000                  | 0.50000                          | 0.800 |
| Ni                      | 0.00000 | 0.00000                  | 0.00000                          | 0.333 |
| Mn                      | 0.00000 | 0.00000                  | 0.00000                          | 0.333 |
| Fe                      | 0.00000 | 0.00000                  | 0.00000                          | 0.333 |
| O                       | 0.00000 | 0.00000                  | 0.26910                          | 1.000 |

|                        |  |                          |  |  |
|------------------------|--|--------------------------|--|--|
| B-5 P2 Phase           |  | Fraction = 10.30%        |  |  |
| R <sub>p</sub> = 2.98% |  | R <sub>wp</sub> = 5.401% |  |  |

| a (Å) = b (Å) = 2.91870 |         | c (Å) = 11.09050 |         | V (Å <sup>3</sup> ) = 81.820224 |
|-------------------------|---------|------------------|---------|---------------------------------|
| atom                    | x       | y                | z       | Occ                             |
| Na <sub>e</sub>         | 0.33333 | 0.66667          | 0.25000 | 0.374                           |
| Na <sub>f</sub>         | 0.00000 | 0.00000          | 0.25000 | 0.426                           |
| Ni                      | 0.00000 | 0.00000          | 0.00000 | 0.333                           |
| Mn                      | 0.00000 | 0.00000          | 0.00000 | 0.333                           |
| Fe                      | 0.00000 | 0.00000          | 0.00000 | 0.333                           |
| O                       | 0.33333 | 0.66667          | 0.08900 | 1.000                           |

**Table S8** Crystallographic data and atomic occupancies of the B-8 from Rietveld refinement with the corresponding XRD data.

| B-8 O3 Phase            |         | Fraction = 61.95%        |         |                                  |
|-------------------------|---------|--------------------------|---------|----------------------------------|
| R <sub>p</sub> = 3.35%  |         | R <sub>wp</sub> = 5.698% |         |                                  |
| a (Å) = b (Å) = 2.95910 |         | c (Å) = 16.22650         |         | V (Å <sup>3</sup> ) = 123.048057 |
| atom                    | x       | y                        | z       | Occ                              |
| Na                      | 0.00000 | 0.00000                  | 0.50000 | 0.800                            |
| Ni                      | 0.00000 | 0.00000                  | 0.00000 | 0.333                            |
| Mn                      | 0.00000 | 0.00000                  | 0.00000 | 0.333                            |
| Fe                      | 0.00000 | 0.00000                  | 0.00000 | 0.333                            |
| O                       | 0.00000 | 0.00000                  | 0.27110 | 1.000                            |
| B-8 P2 Phase            |         | Fraction = 38.05%        |         |                                  |
| R <sub>p</sub> = 3.35%  |         | R <sub>wp</sub> = 5.698% |         |                                  |
| a (Å) = b (Å) = 2.91730 |         | c (Å) = 11.08840         |         | V (Å <sup>3</sup> ) = 81.726272  |
| atom                    | x       | y                        | z       | Occ                              |
| Na <sub>e</sub>         | 0.33333 | 0.66667                  | 0.25000 | 0.375                            |
| Na <sub>f</sub>         | 0.00000 | 0.00000                  | 0.25000 | 0.425                            |
| Ni                      | 0.00000 | 0.00000                  | 0.00000 | 0.333                            |
| Mn                      | 0.00000 | 0.00000                  | 0.00000 | 0.333                            |

|    |         |         |         |       |
|----|---------|---------|---------|-------|
| Fe | 0.00000 | 0.00000 | 0.00000 | 0.333 |
| O  | 0.33333 | 0.66667 | 0.08390 | 1.000 |

**Table S9** The interlayer spacing and bond lengths of the B-x (x=0, 1, 2, 3, 4, 5, 8) from Rietveld refinement with the corresponding XRD data.

| Samples            |          | B-0    | B-1    | B-2    | B-3    | B-4    | B-5    | B-8    |
|--------------------|----------|--------|--------|--------|--------|--------|--------|--------|
| Fraction           | O3 Phase | 100    | 100    | 100    | 100    | 100    | 89.70  | 61.95  |
| (%)                | P2 Phase | 0      | 0      | 0      | 0      | 0      | 10.30  | 38.05  |
| $d_{(O-Na-O)}$ (Å) |          | 3.3028 | 3.3465 | 3.2766 | 3.2475 | 3.2885 | 3.3540 | 3.5013 |
| $d_{(O-TM-O)}$ (Å) |          | 2.1187 | 2.0720 | 2.1392 | 2.1686 | 2.1309 | 2.0759 | 1.9591 |
| $d_{(Na-O)}$ (Å)   |          | 2.3740 | 2.3900 | 2.3660 | 2.3560 | 2.3690 | 2.3927 | 2.4418 |
| $d_{(TM-O)}$ (Å)   |          | 2.0070 | 1.9960 | 2.0150 | 2.0230 | 2.0110 | 1.9957 | 1.9618 |

**Table S10** Electrochemical performance of recent P2/O3 oxide materials reported in the literatures.

| Materials                                                                                                                     | Voltage (V) | Operating temperature (°C) | Initial capacity for cycling (mAh g <sup>-1</sup> ) | Cycling performance    | Capacity loss per cycle | Reference |
|-------------------------------------------------------------------------------------------------------------------------------|-------------|----------------------------|-----------------------------------------------------|------------------------|-------------------------|-----------|
| B-5                                                                                                                           | 2.0-4.0     | 25                         | 86.3<br>(1C)                                        | 92.24%<br>(200 cycles) | 0.03882%                | This work |
| HE-P2/O3                                                                                                                      | 2.0-4.5     | 25                         | 105<br>(1C)                                         | 85.71%<br>(200 cycles) | 0.07145%                | 1         |
| NMFCAT                                                                                                                        | 2.0-4.0     | 25                         | 110<br>(1C)                                         | 80.9%<br>(200 cycles)  | 0.0955%                 | 2         |
| HEO                                                                                                                           | 2.1-4.3     | 25                         | 103.5<br>(1C)                                       | 70.8%<br>(300 cycles)  | 0.0797%                 | 3         |
| Na <sub>0.67</sub> Fe <sub>0.3</sub> Mn <sub>0.5</sub> Li <sub>0.1</sub> Mg <sub>0.1</sub> O <sub>2</sub>                     | 1.8-4.3     | 25                         | 106.25<br>(1C)                                      | 65.88%<br>(200 cycles) | 0.1706%                 | 4         |
| Na <sub>0.76</sub> Ni <sub>0.20</sub> Fe <sub>0.40</sub> Mn <sub>0.40</sub> O <sub>2</sub>                                    | 2.0-4.2     | 25                         | 114<br>(0.1C)                                       | 85.53%<br>(100 cycles) | 0.1447%                 | 5         |
| Na <sub>0.55</sub> Mn <sub>0.4</sub> Ni <sub>0.3</sub> Fe <sub>0.15</sub> Li <sub>0.1</sub> Ti <sub>0.05</sub> O <sub>2</sub> | 2.0-4.2     | 25                         | 80<br>(5C)                                          | 74.3%<br>(2000 cycles) | 0.01285%                | 6         |
| NLNMTF <sub>3</sub>                                                                                                           | 2.5-4.15    | 25                         | 78.8<br>(1C)                                        | 86.5%<br>(500 cycles)  | 0.027%                  | 7         |
| Na <sub>0.76</sub> Ni <sub>0.33</sub> Mn <sub>0.48</sub> O <sub>2</sub>                                                       | 2.0-4.0     | 25                         | 75<br>(2C)                                          | 85.3%<br>(200 cycles)  | 0.0735%                 | 8         |

**Table S11** Impedance results obtained from fitting EIS through an equivalent circuit.

| Samples | $R_s/\Omega$ | $R_f/\Omega$ | $R_{ct}/\Omega$ | $Z_w/\Omega$ |
|---------|--------------|--------------|-----------------|--------------|
| B-0     | 4.25         | 58.91        | 769.5           | —            |
| B-5     | 4.147        | 40.58        | 201.1           | 305.8        |
| B-8     | 3.605        | 46.67        | 37.97           | 206.3        |

## References

1. R. Li, X. Qin, X. Li, J. Zhu, L. R. Zheng, Z. Li and W. Zhou, *Adv. Energy Mater.*, 2024, **14**, 2400127.
2. Y. Chen, Q. Fan, H. Wang, F. Kong, B. Wang, M. Yang, C. Li, Z. Li, Z. Li, Z. Guo, Q. Sun, X. Zhu, M. Jiao, T. Zhai, S. Xia, L. Gu, Z. Zhou and H. Xia, *Adv. Energy Mater.*, 2025, <https://doi.org/10.1002/aenm.202504637e04637>.
3. Z. X. Huang, T. Q. Yang, J. M. Cao, K. Y. Zhang, Y. Liu, B. J. Xin, K. Xu, Y. Liu, X. Y. Zhou, J. Z. Guo, T. Wang, H. Geng and X. L. Wu, *Angew. Chem. Int. Ed.*, 2025, **64**, e202505367.
4. Y. He, Y. Huo, M. Xu and Y. Qi, *Adv. Funct. Mater.*, 2025, **35**, 2509099.
5. A. K. Paidi, W. B. Park, P. Ramakrishnan, S. H. Lee, J. W. Lee, K. S. Lee, H. Ahn, T. Liu, J. Gim, M. Avdeev, M. Pyo, J. I. Sohn, K. Amine, K. S. Sohn, T. J. Shin, D. Ahn and J. Lu, *Adv. Mater.*, 2022, **34**, 2202137.
6. M. Li, H. Zhuo, J. Lei, Y. Guo, Y. Yuan, K. Wang, Z. Liao, W. Xia, D. Geng, X. Sun, J. Hu and B. Xiao, *Nat. Commun.*, 2025, **16**, 2010.
7. Y.-X. Chang, X. Liu, Z.-Y. Xie, Z.-A. Jin, Y. Guo, X. Zhang, J. Zhang, L.-R. Zheng, S. Hong, S. Xu and Y.-X. Yin, *Energy Storage Mater.*, 2025, **74**, 103972.
8. F. Zhang, Q. Long, H. Wang, Y. Wang, D. Guo, Z. Zhu and H. Zhang, *Chem. Eng. J.*, 2025, **517**, 164255.
